# Supplementary material for: Structural basis for self-discrimination by neoantigen-specific TCRs
Source: PubMed Central journal article supplement (PMC10924104; doi:10.1038/s41467-024-46367-9), 2024-03-08
Supplement: 41467_2024_46367_MOESM3_ESM.pdf [file 41467_2024_46367_MOESM3_ESM.pdf]

## **Description of Additional Supplementary Files**

**File Name: Supplementary Data 1  
ProSite Pattern Search Results**
