# Supplementary material for: Structural basis for self-discrimination by neoantigen-specific TCRs
Source: PubMed Central journal article supplement (PMC10924104; doi:10.1038/s41467-024-46367-9), 2024-03-08
Supplement: 41467_2024_46367_MOESM4_ESM.pdf [file 41467_2024_46367_MOESM4_ESM.pdf]

| Pos | Peptide    | ID      | H-2-Db   |          | EL-score | EL_Rank | BA-score | BA_Rank |
|-----|------------|---------|----------|----------|----------|---------|----------|---------|
|     |            |         | core     | icore    |          |         |          |         |
| 0   | NVFRNILHV  | PEPLIST | NVFRNILH | NVFRNILH | 0.4526   | 0.1322  | 0.4209   | 0.1945  |
| 0   | NVFRNILHV  | PEPLIST | NVFRNILH | NVFRNILH | 0.4526   | 0.1322  | 0.4209   | 0.1945  |
| 0   | NVFRNILHV  | PEPLIST | NVFRNILH | NVFRNILH | 0.4526   | 0.1322  | 0.4209   | 0.1945  |
| 0   | RAWRDILAL  | PEPLIST | RAWRDILA | RAWRDILA | 0.2998   | 0.2822  | 0.3162   | 0.5021  |
| 0   | AGYRSIMHL  | PEPLIST | AGYRSIMH | AGYRSIMH | 0.2652   | 0.333   | 0.2511   | 0.9767  |
| 0   | AGYRSIMHL  | PEPLIST | AGYRSIMH | AGYRSIMH | 0.2652   | 0.333   | 0.2511   | 0.9767  |
| 0   | YMCRIIVHF  | PEPLIST | YMCRIIVH | YMCRIIVH | 0.0435   | 2.3523  | 0.1332   | 4.1621  |
| 0   | GSWRDVLAV  | PEPLIST | GSWRDVL  | GSWRDVL  | 0.0284   | 3.3335  | 0.1331   | 4.1643  |
| 0   | LSRRHILHL  | PEPLIST | LSRRHILH | LSRRHILH | 0.0319   | 3.0246  | 0.1194   | 5.2209  |
| 0   | SIFRAVLHF  | PEPLIST | SIFRAVLH | SIFRAVLH | 0.0384   | 2.6076  | 0.119    | 5.2488  |
| 0   | ILYRAVMAI  | PEPLIST | ILYRAVMA | ILYRAVMA | 0.0093   | 7.4455  | 0.1184   | 5.305   |
| 0   | ILYRAVMAI  | PEPLIST | ILYRAVMA | ILYRAVMA | 0.0093   | 7.4455  | 0.1184   | 5.305   |
| 0   | TFFRQVLAL  | PEPLIST | TFFRQVLA | TFFRQVLA | 0.0244   | 3.749   | 0.1146   | 5.6634  |
| 0   | RTKRDILAL  | PEPLIST | RTKRDIL  | RTKRDIL  | 0.0445   | 2.309   | 0.1019   | 7.0563  |
| 0   | RTKRDILAL  | PEPLIST | RTKRDIL  | RTKRDIL  | 0.0445   | 2.309   | 0.1019   | 7.0563  |
| 0   | GRRRHVVHM  | PEPLIST | GRRRHVV  | GRRRHVV  | 0.0263   | 3.5196  | 0.1012   | 7.1524  |
| 0   | EIKRNIMAL  | PEPLIST | EIKRNIMA | EIKRNIMA | 0.0404   | 2.4885  | 0.1005   | 7.2549  |
| 0   | AFYRAVLAL  | PEPLIST | AFYRAVLA | AFYRAVLA | 0.0174   | 4.8738  | 0.0955   | 7.9783  |
| 0   | GSYRCVVHC  | PEPLIST | GSYRCVV  | GSYRCVV  | 0.01     | 7.1321  | 0.0946   | 8.1148  |
| 0   | GSYRCVVHC  | PEPLIST | GSYRCVV  | GSYRCVV  | 0.01     | 7.1321  | 0.0946   | 8.1148  |
| 0   | LLRRDVVHI  | PEPLIST | LLRRDVV  | LLRRDVV  | 0.0078   | 8.3608  | 0.0866   | 9.5573  |
| 0   | LLRRDVVHI  | PEPLIST | LLRRDVV  | LLRRDVV  | 0.0078   | 8.3608  | 0.0866   | 9.5573  |
| 0   | ATFRCILAT  | PEPLIST | ATFRCIL  | ATFRCIL  | 0.0028   | 15.379  | 0.0849   | 9.8745  |
| 0   | LARRHVLAA  | PEPLIST | LARRHVLA | LARRHVLA | 0.0048   | 11.3012 | 0.0845   | 9.9519  |
| 0   | LARRHVLAA  | PEPLIST | LARRHVLA | LARRHVLA | 0.0048   | 11.3012 | 0.0845   | 9.9519  |
| 0   | EARRHILAI  | PEPLIST | EARRHILA | EARRHILA | 0.012    | 6.3137  | 0.0833   | 10.2062 |
| 0   | LSRRFILHV  | PEPLIST | LSRRFILH | LSRRFILH | 0.0064   | 9.5029  | 0.0826   | 10.3528 |
| 0   | SIRRQILAL  | PEPLIST | SIRRQILA | SIRRQILA | 0.0142   | 5.6215  | 0.0808   | 10.7562 |
| 0   | LPCRHILAL  | PEPLIST | LPCRHILA | LPCRHILA | 0.0105   | 6.908   | 0.0685   | 14.1037 |
| 0   | LPCRHILAM  | PEPLIST | LPCRHILA | LPCRHILA | 0.0083   | 8.0142  | 0.0672   | 14.5884 |
| 0   | CACRDVLAW  | PEPLIST | CACRDVLA | CACRDVLA | 0.0047   | 11.3713 | 0.0616   | 16.6353 |
| 0   | EGRRIVAI   | PEPLIST | EGRRIVA  | EGRRIVA  | 0.0065   | 9.4107  | 0.0575   | 18.4758 |
| 0   | AFFRAVAF   | PEPLIST | AFFRAVVA | AFFRAVVA | 0.0058   | 10.1453 | 0.057    | 18.6616 |
| 0   | AFFRAVAF   | PEPLIST | AFFRAVVA | AFFRAVVA | 0.0058   | 10.1453 | 0.057    | 18.6616 |
| 0   | DIFRIIMAI  | PEPLIST | DIFRIIMA | DIFRIIMA | 0.0031   | 14.4191 | 0.0542   | 20.0842 |
| 0   | DIFRIIMAI  | PEPLIST | DIFRIIMA | DIFRIIMA | 0.0031   | 14.4191 | 0.0542   | 20.0842 |
| 0   | QEKRHVLHL  | PEPLIST | QEKRHVLH | QEKRHVLH | 0.024    | 3.8028  | 0.0541   | 20.1428 |
| 0   | SRRRQILHL  | PEPLIST | SRRRQILH | SRRRQILH | 0.0083   | 8.073   | 0.0522   | 21.1944 |
| 0   | HGKRVVVAA  | PEPLIST | HGKRVVV  | HGKRVVV  | 0.0035   | 13.6709 | 0.0494   | 22.8427 |
| 0   | KKRRSIVAV  | PEPLIST | KKRRSIVA | KKRRSIVA | 0.002    | 18.2525 | 0.0452   | 25.617  |
| 0   | KKRRSIVAV  | PEPLIST | KKRRSIVA | KKRRSIVA | 0.002    | 18.2525 | 0.0452   | 25.617  |
| 0   | AERRSVMMAA | PEPLIST | AERRSVM  | AERRSVM  | 0.0015   | 21.3901 | 0.0417   | 28.3027 |
| 0   | AERRSVMMAA | PEPLIST | AERRSVM  | AERRSVM  | 0.0015   | 21.3901 | 0.0417   | 28.3027 |
| 0   | VVKRFILHA  | PEPLIST | VVKRFILH | VVKRFILH | 0.0019   | 18.8485 | 0.0413   | 28.5849 |

|   |           |         |                       |        |         |        |         |
|---|-----------|---------|-----------------------|--------|---------|--------|---------|
| 0 | VDYRGVLAC | PEPLIST | VDYRGVLA VDYRGVLA     | 0.0015 | 21.0284 | 0.0388 | 30.9479 |
| 0 | LDKRDIVHL | PEPLIST | LDKRDIVHI LDKRDIVHI   | 0.0117 | 6.4078  | 0.0386 | 31.0808 |
| 0 | YFKRVVLA  | PEPLIST | YFKRVVLA, YFKRVVLA,   | 0.0012 | 23.9643 | 0.0374 | 32.3568 |
| 0 | YFKRVVLA  | PEPLIST | YFKRVVLA, YFKRVVLA,   | 0.0012 | 23.9643 | 0.0374 | 32.3568 |
| 0 | NYCRHVLAA | PEPLIST | NYCRHVLA NYCRHVLA     | 0.0005 | 34.8333 | 0.0367 | 33.1487 |
| 0 | PKYRNVVAT | PEPLIST | PKYRNVVA PKYRNVVA     | 0.0004 | 38.8148 | 0.034  | 35.9977 |
| 0 | RICRMVLAT | PEPLIST | RICRMVLA RICRMVLA     | 0.0002 | 49.3333 | 0.033  | 37.2556 |
| 0 | DFFRSVVAA | PEPLIST | DFFRSVVA, DFFRSVVA,   | 0.0008 | 28.0606 | 0.0327 | 37.5464 |
| 0 | GDKRAVLAM | PEPLIST | GDKRAVLA GDKRAVLA     | 0.0027 | 15.7376 | 0.0319 | 38.5307 |
| 0 | DVYRDILAC | PEPLIST | DVYRDILAC DVYRDILAC   | 0.0007 | 29.2807 | 0.031  | 39.6491 |
| 0 | GKKRSVMAF | PEPLIST | GKKRSVM, GKKRSVM,     | 0.0025 | 16.3799 | 0.0299 | 41.1542 |
| 0 | GKKRSVMAF | PEPLIST | GKKRSVM, GKKRSVM,     | 0.0025 | 16.3799 | 0.0299 | 41.1542 |
| 0 | RLWRVVLAC | PEPLIST | RLWRVVL, RLWRVVL,     | 0.0005 | 33.975  | 0.028  | 43.9731 |
| 0 | LLRRAVLAC | PEPLIST | LLRRAVLAC LLRRAVLAC   | 0.0002 | 46.8462 | 0.0235 | 51.838  |
| 0 | PVYRAVMAA | PEPLIST | PVYRAVM, PVYRAVM,     | 0.0002 | 48      | 0.0221 | 54.6437 |
| 0 | PKFRSIVHA | PEPLIST | PKFRSIVHA, PKFRSIVHA, | 0.0002 | 47.3846 | 0.0189 | 61.6397 |
| 0 | PKFRSIVHA | PEPLIST | PKFRSIVHA, PKFRSIVHA, | 0.0002 | 47.3846 | 0.0189 | 61.6397 |
| 0 | PKFRSIVHA | PEPLIST | PKFRSIVHA, PKFRSIVHA, | 0.0002 | 47.3846 | 0.0189 | 61.6397 |
| 0 | PKFRSIVHA | PEPLIST | PKFRSIVHA, PKFRSIVHA, | 0.0002 | 47.3846 | 0.0189 | 61.6397 |
| 0 | PKFRSIVHA | PEPLIST | PKFRSIVHA, PKFRSIVHA, | 0.0002 | 47.3846 | 0.0189 | 61.6397 |
| 0 | QRRRAVVAC | PEPLIST | QRRRAVV, QRRRAVV,     | 0.0002 | 51.4444 | 0.0159 | 69.0902 |
| 0 | QRKRAVVAC | PEPLIST | QRKRAVV, QRKRAVV,     | 0.0002 | 44.0625 | 0.0152 | 70.9584 |
| 0 | QRKRAVVAC | PEPLIST | QRKRAVV, QRKRAVV,     | 0.0002 | 44.0625 | 0.0152 | 70.9584 |
| 0 | QRKRAVVAC | PEPLIST | QRKRAVV, QRKRAVV,     | 0.0002 | 44.0625 | 0.0152 | 70.9584 |
| 0 | PKRRDILAI | PEPLIST | PKRRDILAI PKRRDILAI   | 0.0001 | 56.9697 | 0.0142 | 73.6035 |
| 0 | PKRRDILAI | PEPLIST | PKRRDILAI PKRRDILAI   | 0.0001 | 56.9697 | 0.0142 | 73.6035 |
| 0 | DEKRAVLAT | PEPLIST | DEKRAVLA DEKRAVLA     | 0.0001 | 55.1515 | 0.0107 | 83.8889 |
| 0 | DIKRAVVHT | PEPLIST | DIKRAVVH, DIKRAVVH,   | 0.0001 | 58.7879 | 0.0105 | 84.4062 |
| 0 | EECRAVLHT | PEPLIST | EECRAVLH, EECRAVLH,   | 0      | 71.1538 | 0.0105 | 84.4827 |
| 0 | EECRAVLHT | PEPLIST | EECRAVLH, EECRAVLH,   | 0      | 71.1538 | 0.0105 | 84.4827 |

Search Pattern: x-x-[CRFKWY]-R-{KLPWYRTE}-[IV]-[VM

| Ave    | NB |
|--------|----|
| 0.4526 | 1  |
| 0.4526 | 1  |
| 0.4526 | 1  |
| 0.4526 | 1  |
| 0.2998 | 1  |
| 0.2652 | 1  |
| 0.2652 | 1  |
| 0.0435 | 0  |
| 0.0284 | 0  |
| 0.0319 | 0  |
| 0.0384 | 0  |
| 0.0093 | 0  |
| 0.0093 | 0  |
| 0.0244 | 0  |
| 0.0445 | 0  |
| 0.0445 | 0  |
| 0.0263 | 0  |
| 0.0404 | 0  |
| 0.0174 | 0  |
| 0.01   | 0  |
| 0.01   | 0  |
| 0.0078 | 0  |
| 0.0078 | 0  |
| 0.0028 | 0  |
| 0.0048 | 0  |
| 0.0048 | 0  |
| 0.012  | 0  |
| 0.0064 | 0  |
| 0.0142 | 0  |
| 0.0105 | 0  |
| 0.0083 | 0  |
| 0.0047 | 0  |
| 0.0065 | 0  |
| 0.0058 | 0  |
| 0.0058 | 0  |
| 0.0031 | 0  |
| 0.0031 | 0  |
| 0.024  | 0  |
| 0.0083 | 0  |
| 0.0035 | 0  |
| 0.002  | 0  |
| 0.002  | 0  |
| 0.0015 | 0  |
| 0.0015 | 0  |
| 0.0019 | 0  |

Prosite, Uniprot/swissDb, Mus musculus

|        |   |
|--------|---|
| 0.0015 | 0 |
| 0.0117 | 0 |
| 0.0012 | 0 |
| 0.0012 | 0 |
| 0.0005 | 0 |
| 0.0004 | 0 |
| 0.0002 | 0 |
| 0.0008 | 0 |
| 0.0027 | 0 |
| 0.0007 | 0 |
| 0.0025 | 0 |
| 0.0025 | 0 |
| 0.0005 | 0 |
| 0.0002 | 0 |
| 0.0002 | 0 |
| 0.0002 | 0 |
| 0.0002 | 0 |
| 0.0002 | 0 |
| 0.0002 | 0 |
| 0.0002 | 0 |
| 0.0002 | 0 |
| 0.0002 | 0 |
| 0.0002 | 0 |
| 0.0002 | 0 |
| 0.0002 | 0 |
| 0.0002 | 0 |
| 0.0002 | 0 |
| 0.0001 | 0 |
| 0.0001 | 0 |
| 0.0001 | 0 |
| 0.0001 | 0 |
| 0      | 0 |
| 0      | 0 |

L]-[HA]-[ILMVCAFWT]
